# Supplementary material for: A hydrazono-quinoline-based chemosensor sensing In3+ and Zn2+via fluorescence turn-on and ClO−via color change in aqueous solution
Source: Royal Society of Chemistry journal article supplement (doi:10.1039/c9nj00899c), 2019-01-01
Supplement: c9nj00899c1.pdf [file c9nj00899c1.pdf]

## Supporting Information

### **A hydrazone-quinoline-based chemosensor sensing $\text{In}^{3+}$ and $\text{Zn}^{2+}$ via fluorescence turn-on and $\text{ClO}^-$ via color change in aqueous solution**

Ahran Kim, Cheal Kim\*

*Department of Fine Chemistry, Seoul National Univ. of Science & Technology (SNUT),  
Seoul, 01811, South Korea. Fax: +82-2-972-9149; Tel: +82-2-972-6681; E-mail:  
[chealkim@seoultech.ac.kr](mailto:chealkim@seoultech.ac.kr)*

**Table S1.** Indium chemosensors reported to date.

| No. | Sensor                                                                              | Detection limit ( $\mu\text{M}$ ) | Percent of water in solution (%) | Method of detection                                | Reference |
|-----|-------------------------------------------------------------------------------------|-----------------------------------|----------------------------------|----------------------------------------------------|-----------|
| 1   | 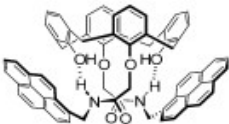   | No data                           | 0                                | <b>Fluorescence turn-on</b>                        | 1         |
| 2   |    | 0.19                              | 0                                | <b>Fluorescence turn-off</b>                       | 2         |
| 3   |   | No data                           | 0                                | <b>Ratiometric fluorescence change</b>             | 3         |
| 4   |  | 2.0                               | 0                                | <b>Fluorescence turn-on</b>                        | 4         |
| 5   |  | 10.0                              | 50                               | <b>Fluorescence turn-on</b><br><b>Color change</b> | 5         |
| 6   |  | No data                           | 1                                | <b>Fluorescence turn-on</b>                        | 6         |

|    |                                                                                     |         |    |                                                     |           |
|----|-------------------------------------------------------------------------------------|---------|----|-----------------------------------------------------|-----------|
| 7  | 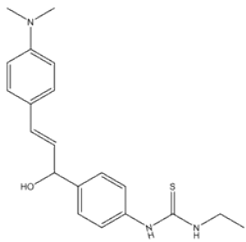   | 10.4    | 95 | <b>Fluorescence turn-off</b><br><b>Color change</b> | 7         |
| 8  |    | No data | 0  | <b>Fluorescence turn-on</b>                         | 8         |
| 9  |   | 5.89    | 0  | <b>Fluorescence turn-on</b>                         | 9         |
| 10 |  | 0.064   | 99 | <b>Ratiometric fluorescence change</b>              | 10        |
| 11 |  | 7.92    | 0  | <b>Fluorescence turn-on</b>                         | 11        |
| 12 |  | 0.89    | 0  | <b>Fluorescence turn-on</b>                         | 12        |
| 13 |  | 0.05    | 70 | <b>Fluorescence turn-on</b>                         | This work |

## Reference

- 1 S. K. Kim, S. H. Kim, H. J. Kim, S. H. Lee, S. W. Lee, J. Ko, R. A. Bartsch and J. S. Kim, *Inorg. Chem.*, 2005, **44**, 7866-7875.
- 2 Y.-C. Wu, H.-J. Li and H.-Z. Yang, *Org. Biomol. Chem.*, 2010, **8**, 3394–3397.
- 3 D. Y. Han, J. M. Kim, J. Kim, H. S. Jung, Y. H. Lee, J. F. Zhang and J. S. Kim, *Tetrahedron Lett.*, 2010, **51**, 1947–1951.
- 4 H. Kim, K. B. Kim, E. J. Song, I. H. Hwang, J. Y. Noh, P. G. Kim, K. D. Jeong and C. Kim, *Inorg. Chem. Commun.*, 2013, **36**, 72–76.
- 5 Y.-M. Kho and E. Shin, *Molecules*, 2017, **22**, 1569.
- 6 A. Kim, J. H. Kang, H. J. Jang and C. Kim, *J. Ind. Eng. Chem.*, 2018, **65**, 290-299.
- 7 M. Lo Presti, S. El Sayed, R. Martínez-Máñez, A. M. Costero, S. Gil, M. Parra and F. Sancenón, *New J. Chem.*, 2016, **40**, 9042–9045.
- 8 K. Ostrowska, A. Kaźmierska, M. Rapała-Kozik and J. Kalinowska-Thłuscik, *New J. Chem.*, 2014, **38**, 213–226.
- 9 S. Y. Lee, M. Yang and C. Kim, *Spectrochim. Acta A*, 2018, **205**, 622–629.
- 10 P. K. Mehta, G. W. Hwang, J. Park and K.-H. Lee, *Anal. Chem.*, 2018, **90**, 11256–11264.
- 11 H. J. Jang, J. H. Kang, D. Yun and C. Kim, *Photochem. Photobiol. Sci.*, 2018, **17**, 1247–1255.
- 12 C. Kim and J. B. Chae, *J. Fluoresc.*, 2018, **28**, 1363–1370.

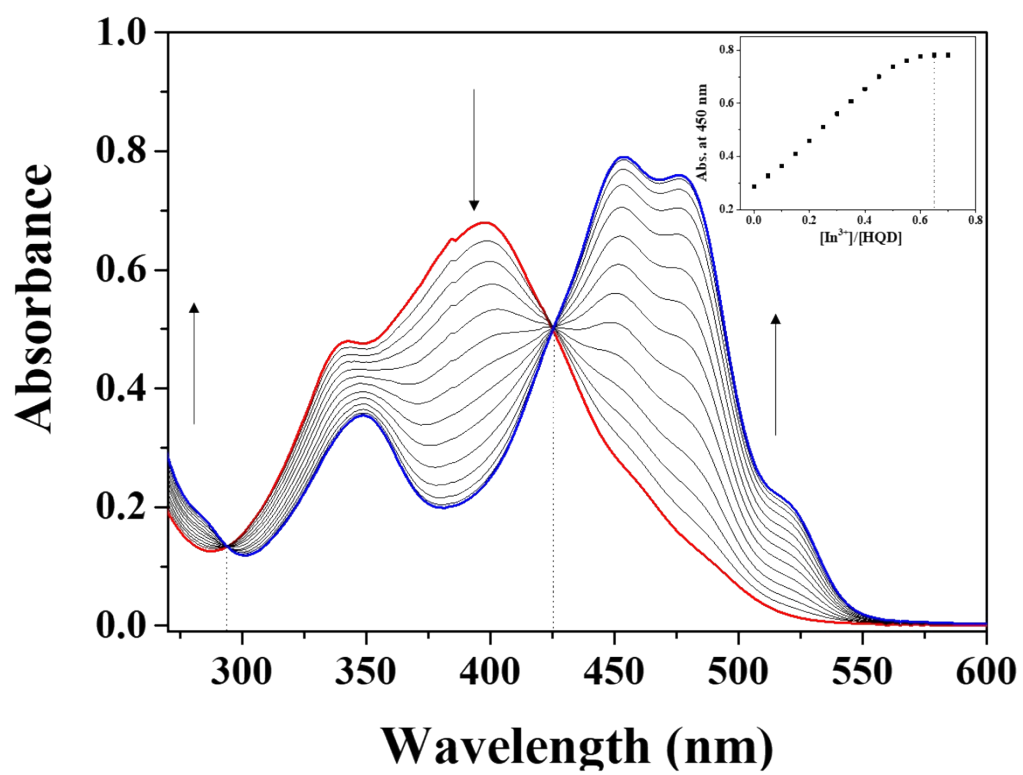

Fig. S1 Change of UV-vis spectra of HQD (30 μM) with different indium concentration.

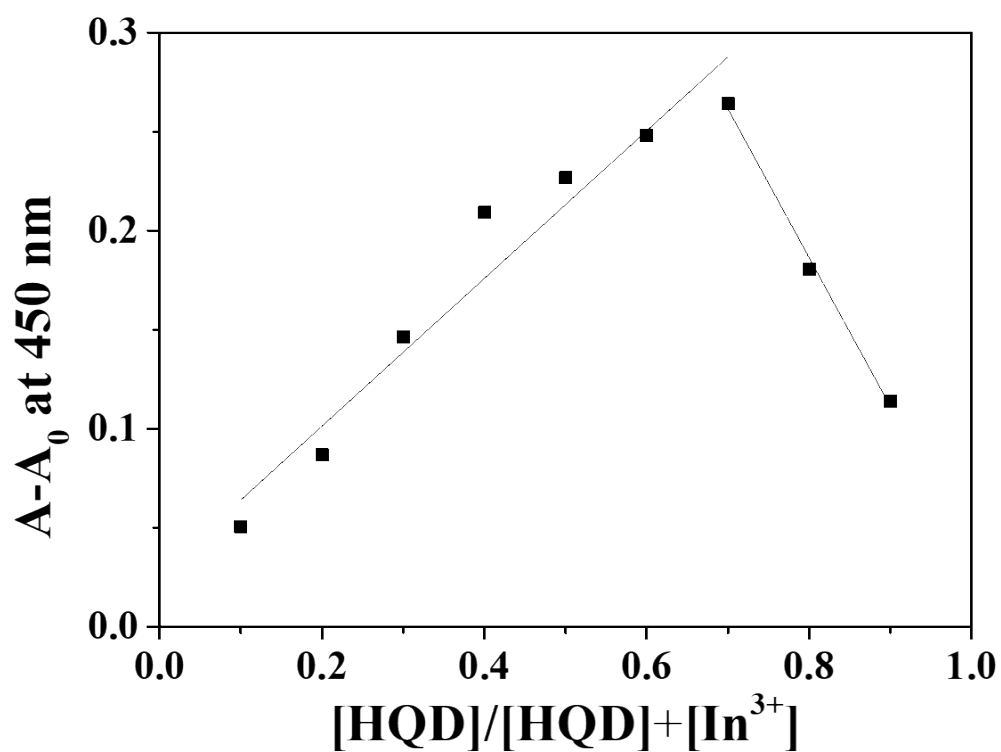

**Fig. S2** Job plot of **HQD** with  $\text{In}^{3+}$ . Absorbance at 450 nm was plotted as a function of the molar ratio of  $[\text{HQD}]/([\text{HQD}] + [\text{In}^{3+}])$ . The total concentration of  $\text{In}^{3+}$  with sensor **HQD** was  $30 \mu\text{M}$ . [ $A$  is the absorbance of **HQD**- $\text{In}^{3+}$  and  $A_0$  is the absorbance of **HQD**].

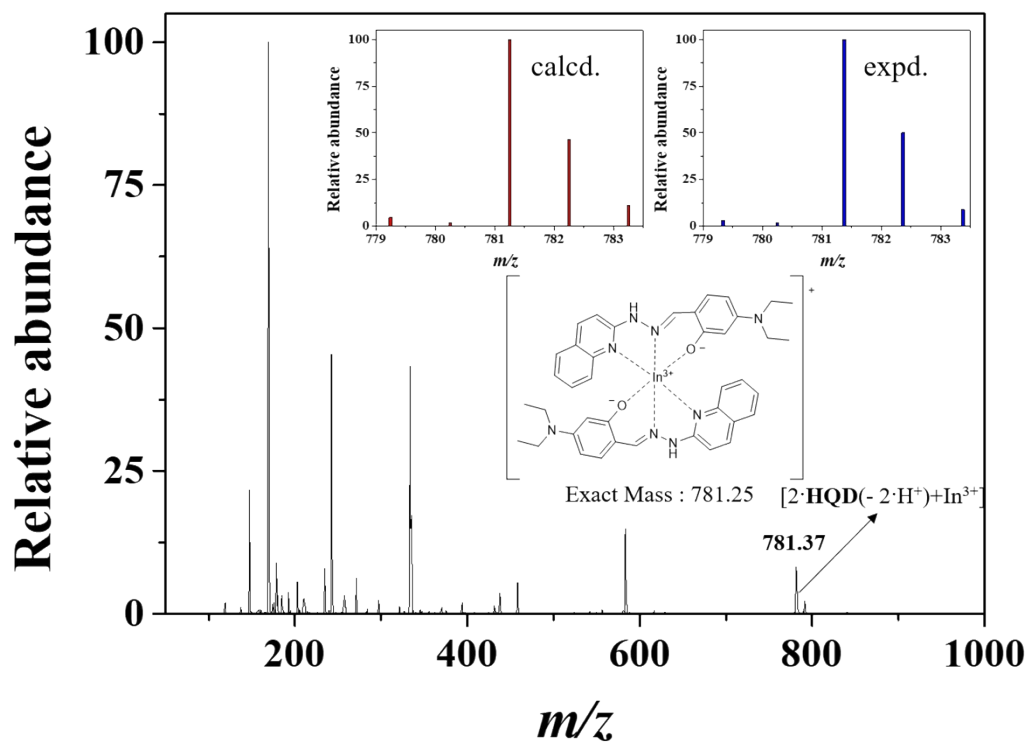

**Fig. S3** Positive-ion electrospray ionization (ESI) mass spectrum and pattern of sensor **HQD** (100  $\mu\text{M}$ ) upon addition of indium ion (50  $\mu\text{M}$ ).

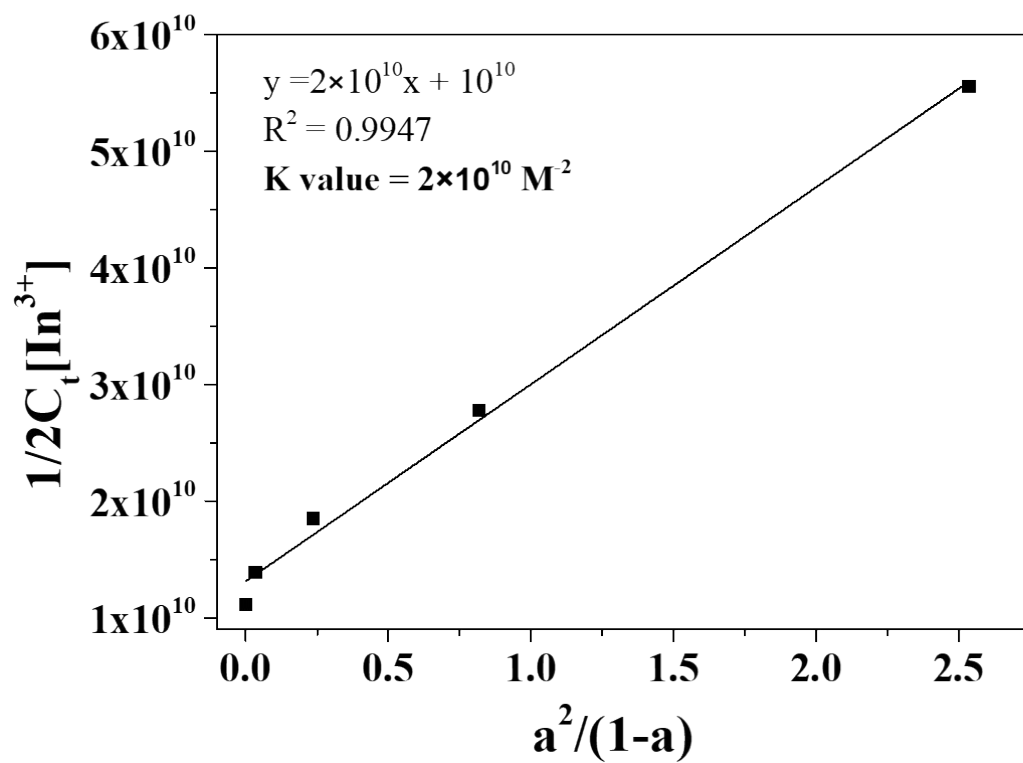

**Fig. S4** Li's equation plot of **HQD** (30  $\mu\text{M}$ ) for  $\text{In}^{3+}$ .



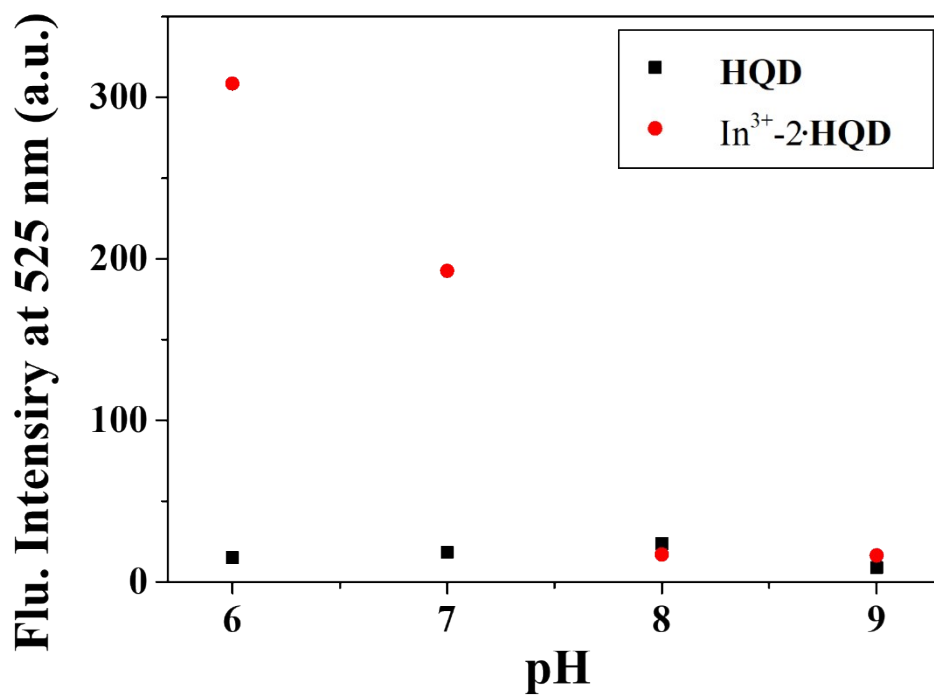

Fig. S5 Fluorescence intensity (525nm) of HQD and In<sup>3+</sup>-2·HQD in different pH.

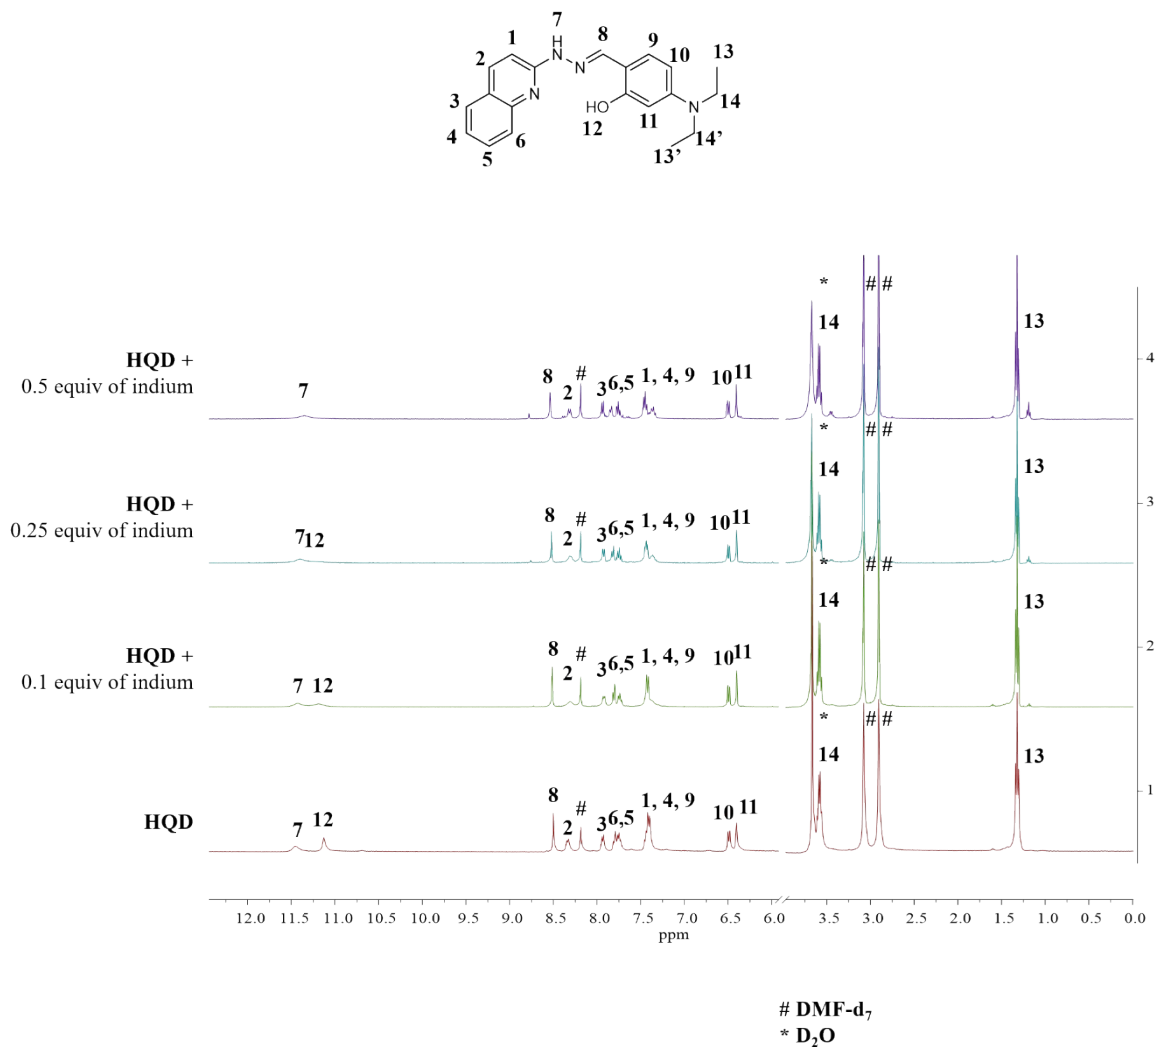

**Fig. S6**  $^1\text{H}$  NMR titration of HQD with  $\text{In}(\text{NO}_3)_3$ .

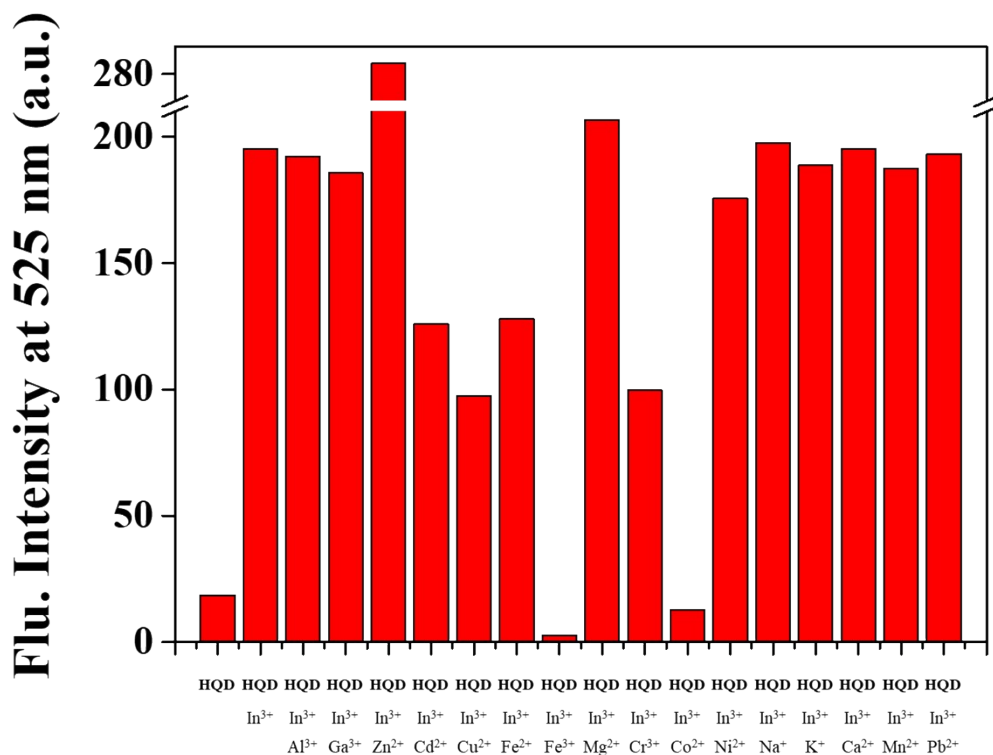

**Fig. S7** Competitive selectivity of **HQD** (30  $\mu\text{M}$ ) toward  $\text{In}^{3+}$  ions (0.5 equiv) in the presence of other metal ions (0.5 equiv).

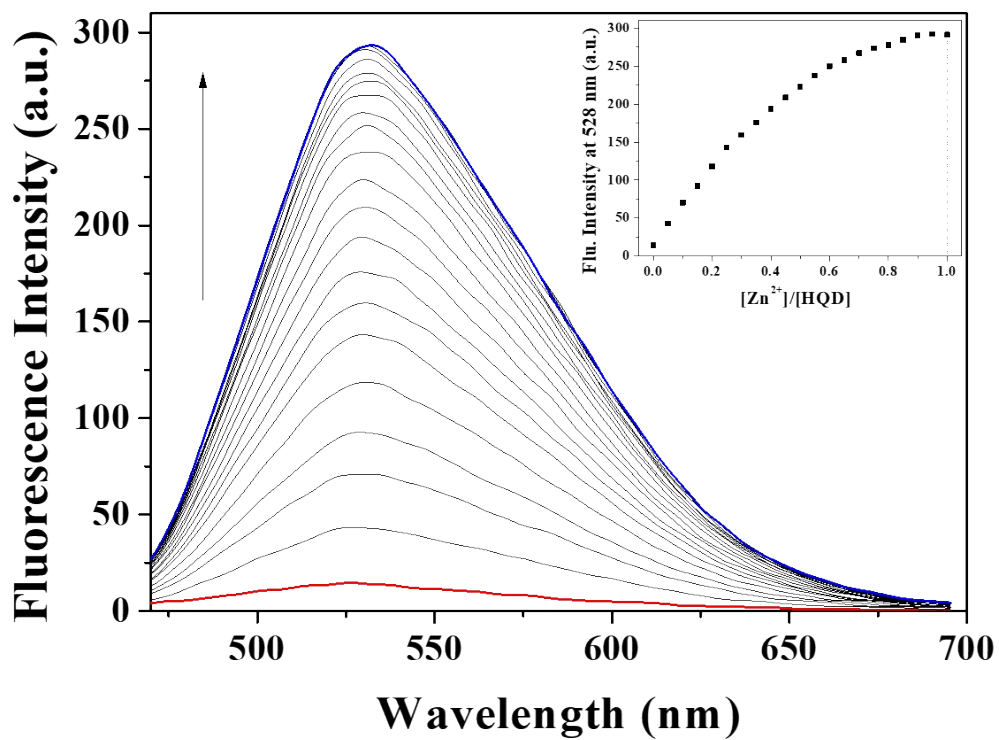

**Fig. S8** Change of fluorescence spectra of **HQD** (30 μM) with different Zn<sup>2+</sup> concentration.

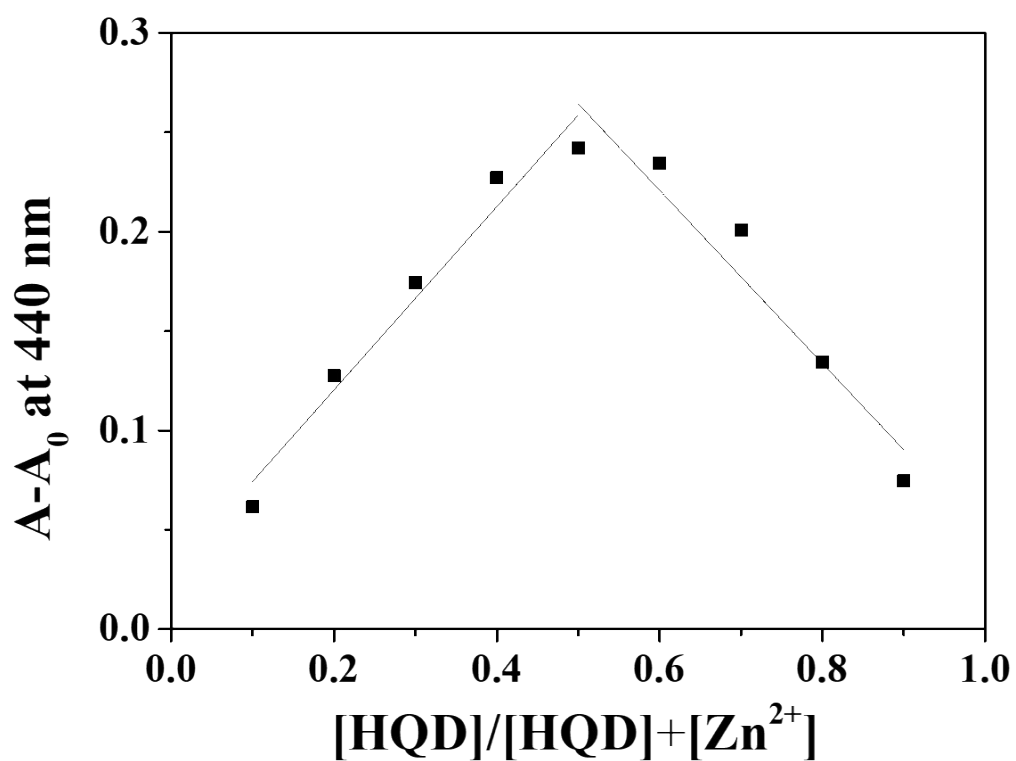

**Fig. S9** Job plot of **HQD** with  $\text{Zn}^{2+}$ . Absorbance at 440 nm was plotted as a function of the molar ratio of  $[\text{HQD}]/([\text{HQD}] + [\text{Zn}^{2+}])$ . The total concentration of  $\text{Zn}^{2+}$  ions with sensor **HQD** was  $30 \mu\text{M}$ . [ $A$  is the absorbance of **HQD-Zn**<sup>2+</sup> and  $A_0$  is the absorbance of **HQD**].

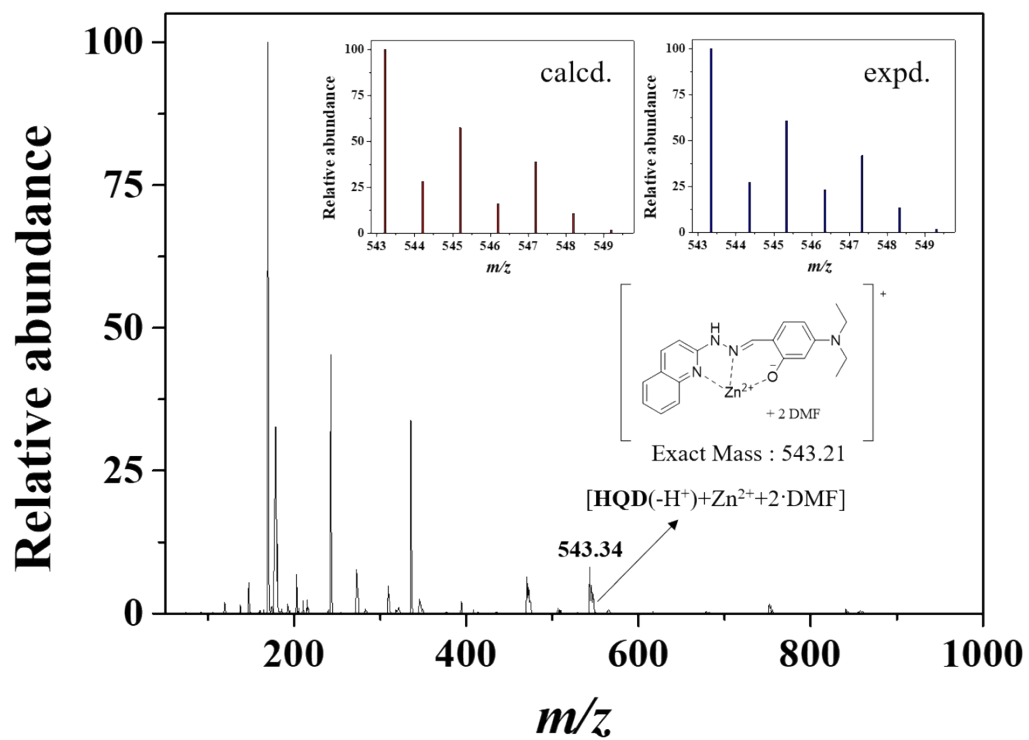

**Fig. S10** Positive-ion electrospray ionization (ESI) mass spectrum of **HQD** (100  $\mu\text{M}$ ) upon addition of zinc ion (1 equiv).

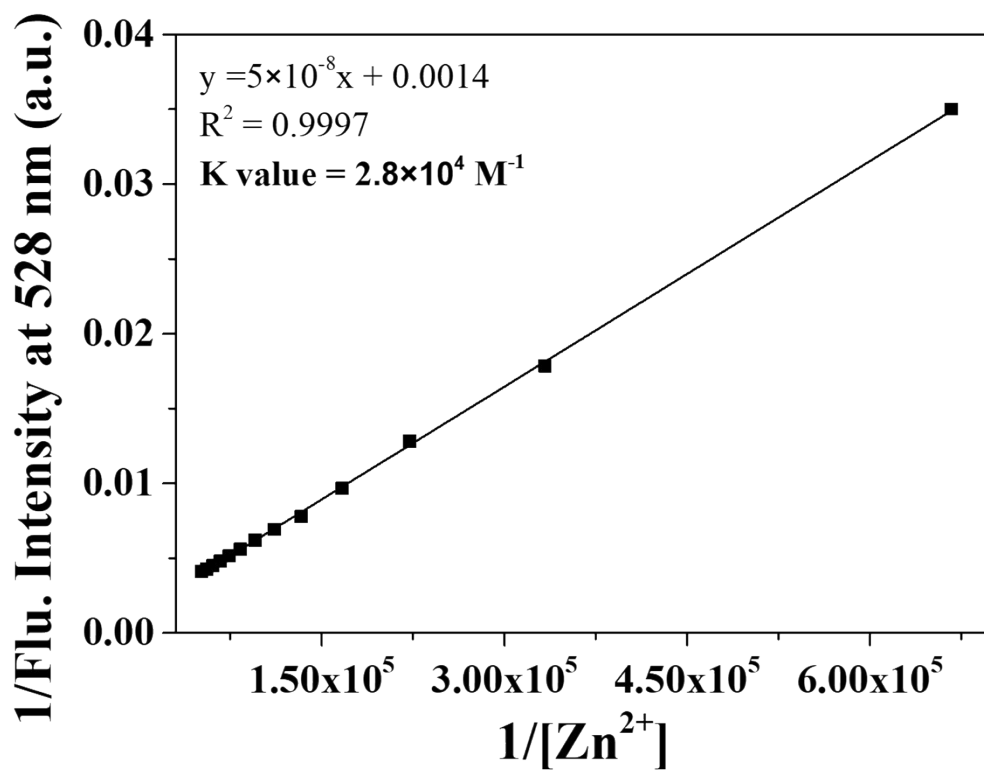

Fig. S11 Benesi-Hildebrand equation plot of HQD (30  $\mu\text{M}$ ) for  $\text{Zn}^{2+}$ .

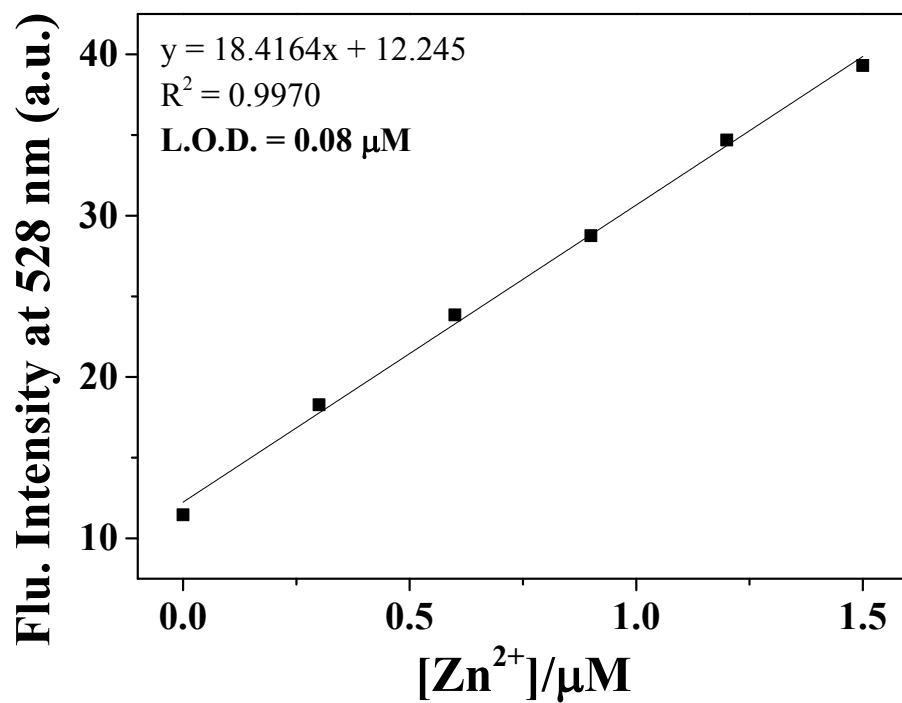

Fig. S12 L.O.D. for Zn<sup>2+</sup> by HQD (30 μM) based on the  $3\sigma$ /slope.



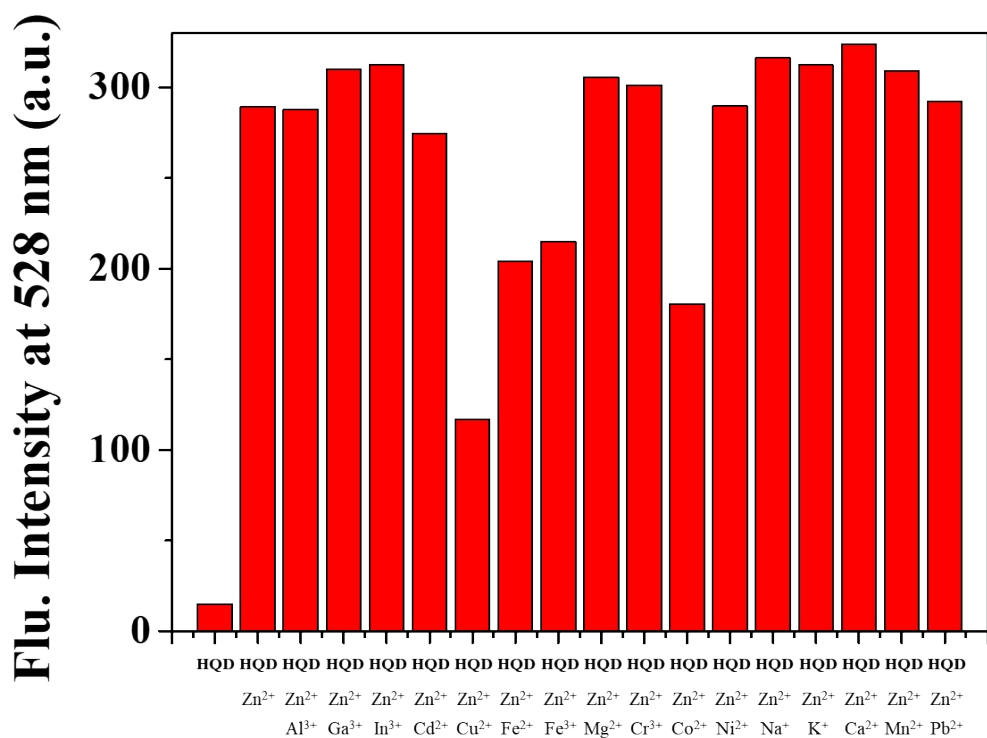

**Fig. S13** Competitive selectivity of **HQD** (30 μM) toward Zn<sup>2+</sup> ions (1 equiv) in the presence of other metal ions (1 equiv).

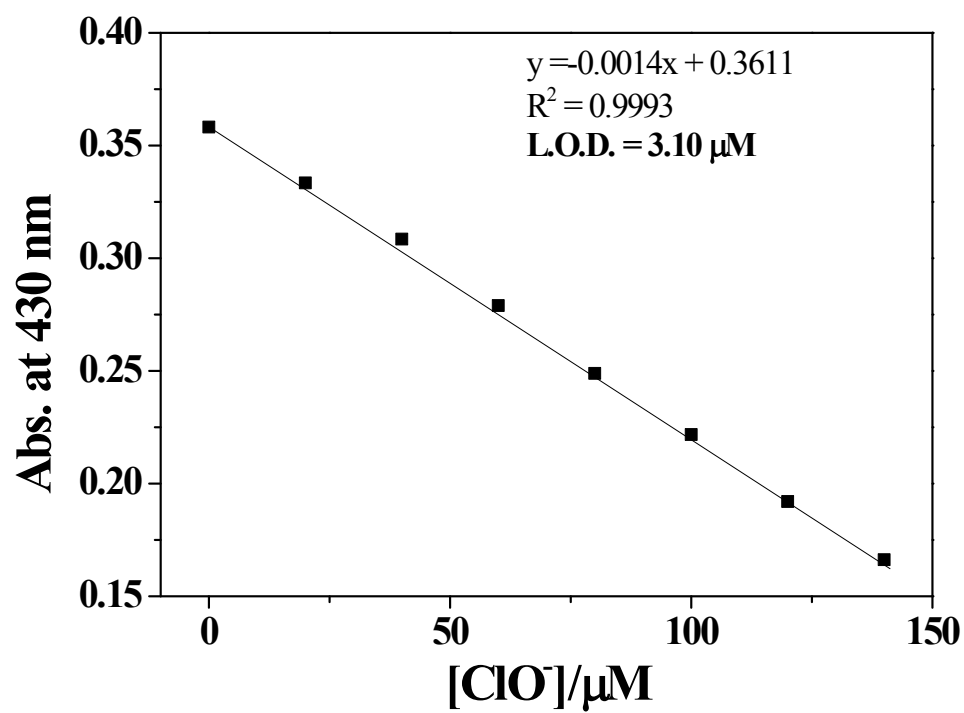

Fig. S14 L.O.D. for  $\text{ClO}^-$  by HQD ( $20 \mu\text{M}$ ) based on the  $3\sigma/\text{slope}$ .

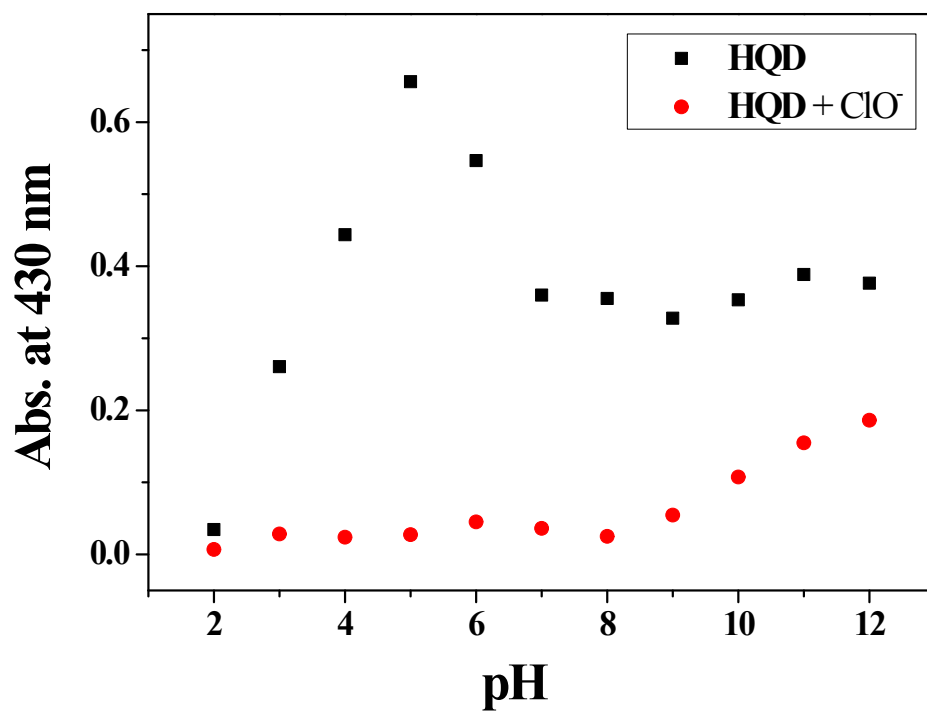

Fig. S15 Absorbance (430 nm) of HQD and HQD with ClO<sup>-</sup> in different pH.

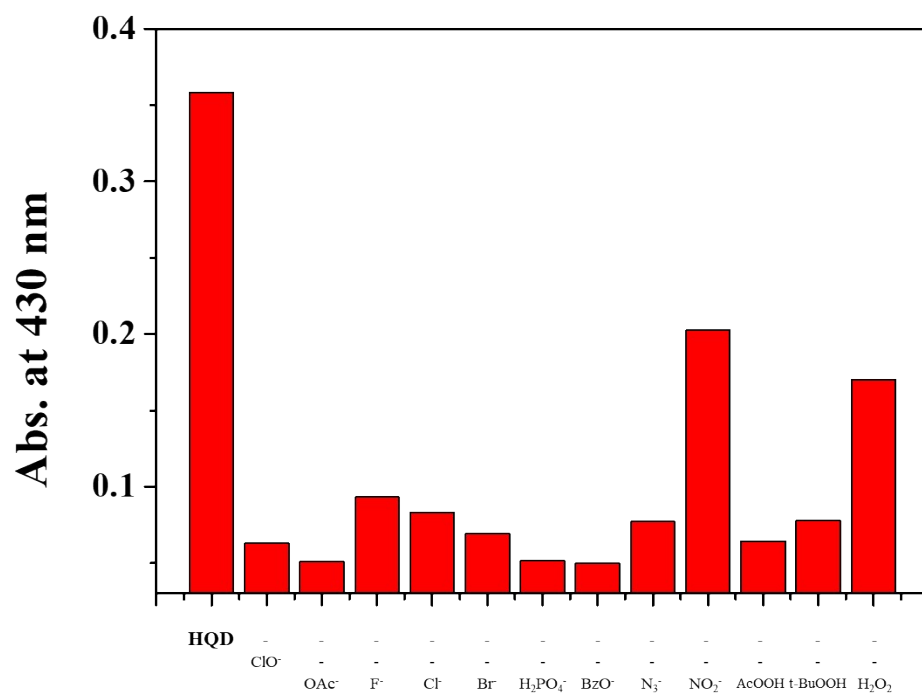

**Fig. S16** Absorbance (430 nm) of **HQD** (20  $\mu$ M) toward  $\text{ClO}^-$  (20 equiv) in the presence of other anions and ROS (20 equiv).

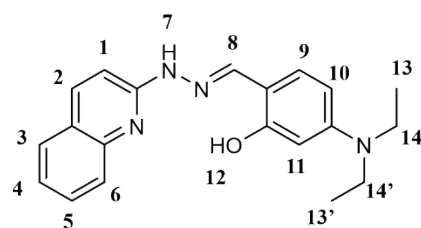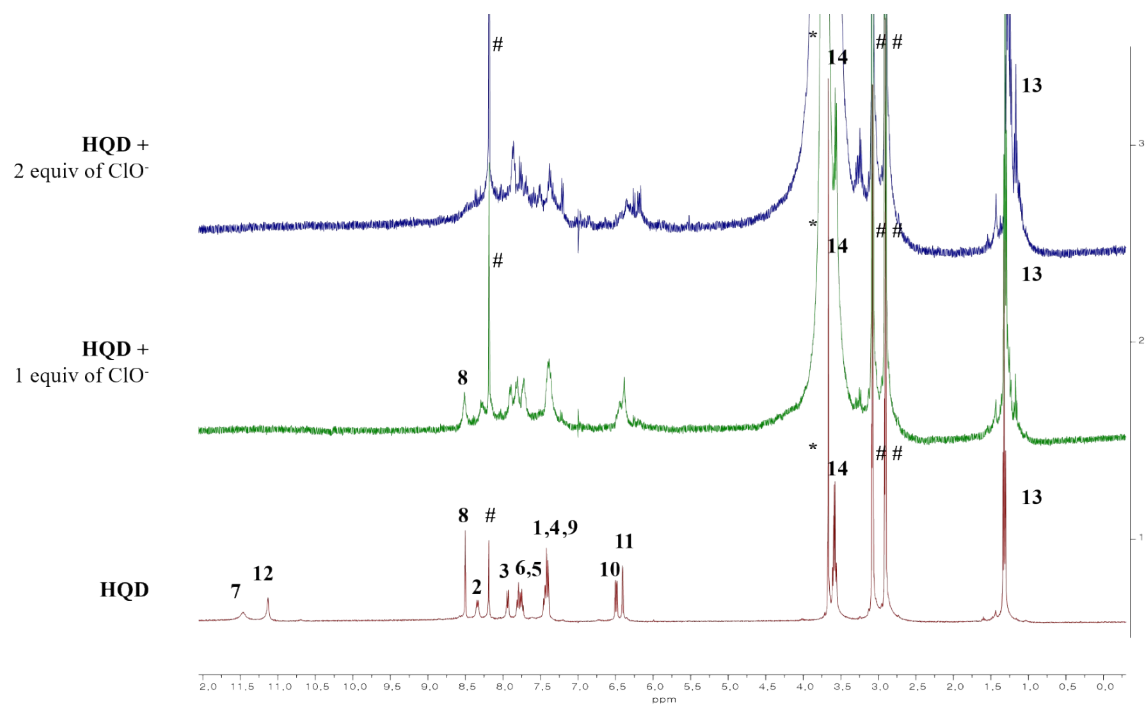

# DMF-d<sub>7</sub>  
\* D<sub>2</sub>O

**Fig. S17** <sup>1</sup>H NMR titration of **HQD** with NaClO.

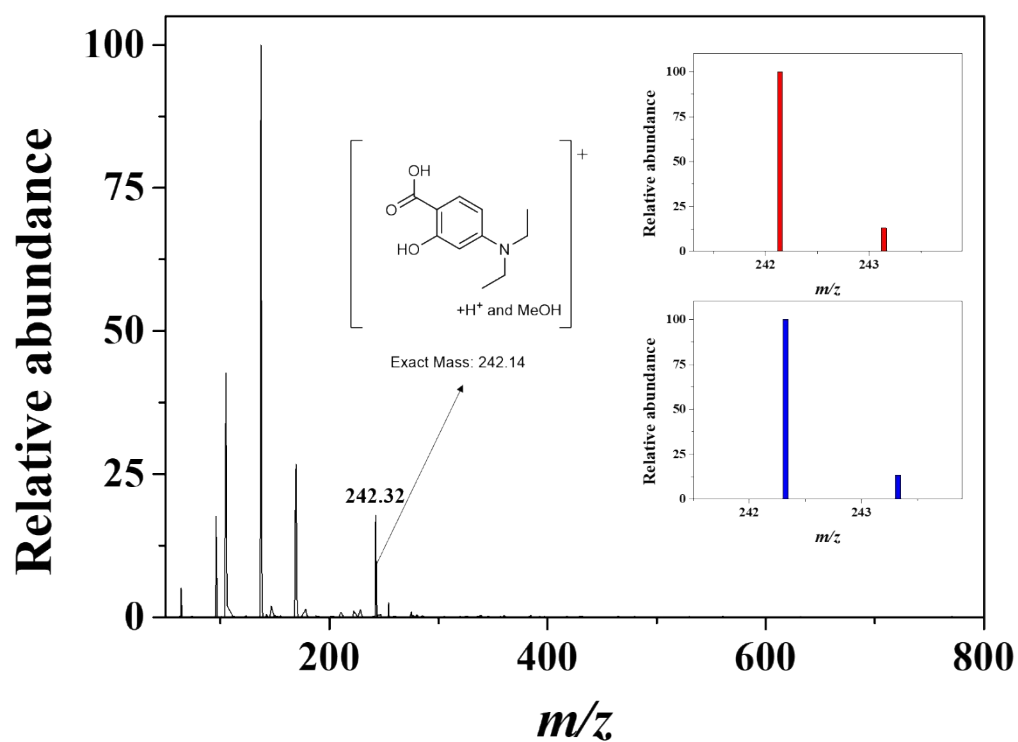

**Fig. S18** Positive-ion electrospray ionization (ESI) mass spectrum and pattern of sensor **HQD** (100  $\mu$ M) upon addition of NaClO (1 equiv).

(a)

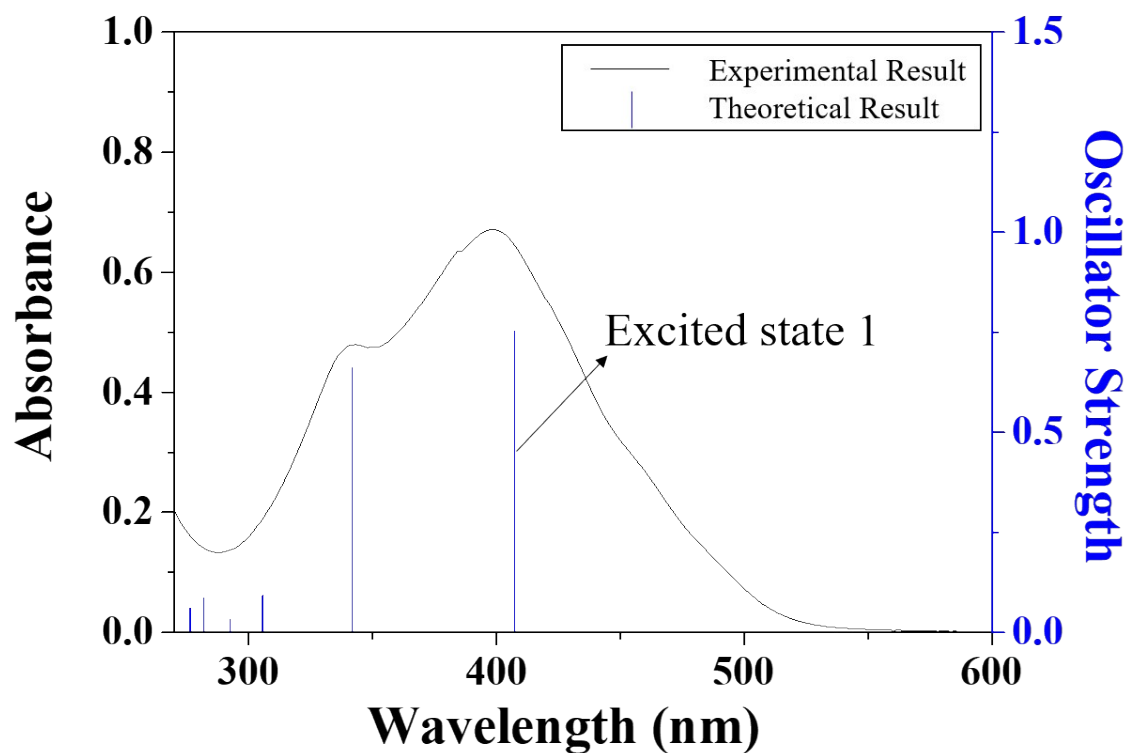

(b)

| Excited state 1 | Wavelength (nm) | Percent (%) | Main Character | Oscillator strength |
|-----------------|-----------------|-------------|----------------|---------------------|
| H → L           | 407.41          | 99          | ICT            | 0.7541              |

**Fig. S19** (a) The theoretical excitation energies and the experimental UV-vis spectrum of **HQD**. (b) The major electronic transition energies and molecular orbital contributions of **HQD** (H = HOMO and L = LUMO).

(a)

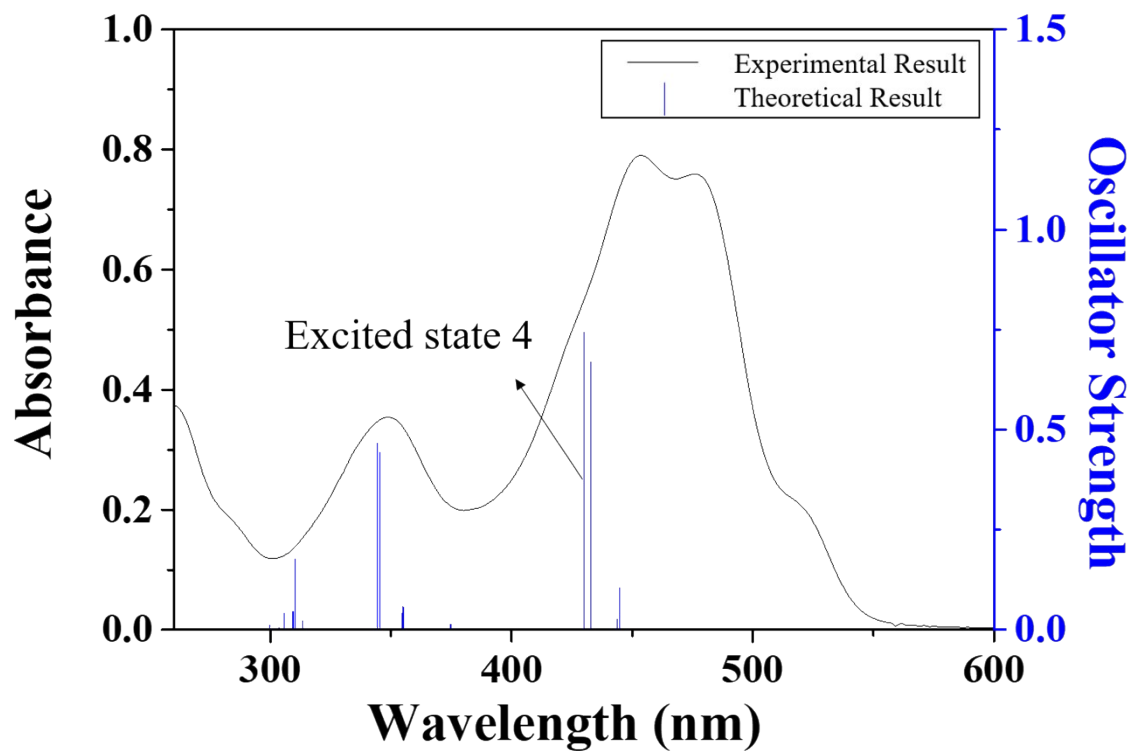

(b)

| Excited state 4 | Wavelength (nm) | Percent (%) | Main Character | Oscillator strength |
|-----------------|-----------------|-------------|----------------|---------------------|
| H → L+1         | 430.18          | 67          | ICT            | 0.7444              |
| H-1 → L         |                 | 31          | ICT            |                     |

**Fig. S20** (a) The theoretical excitation energies and the experimental UV-vis spectrum of  $\text{In}^{3+}\cdot 2\cdot\text{HQD}$ . (b) The major electronic transition energies and molecular orbital contributions of  $\text{In}^{3+}\cdot 2\cdot\text{HQD}$  (H = HOMO and L = LUMO).



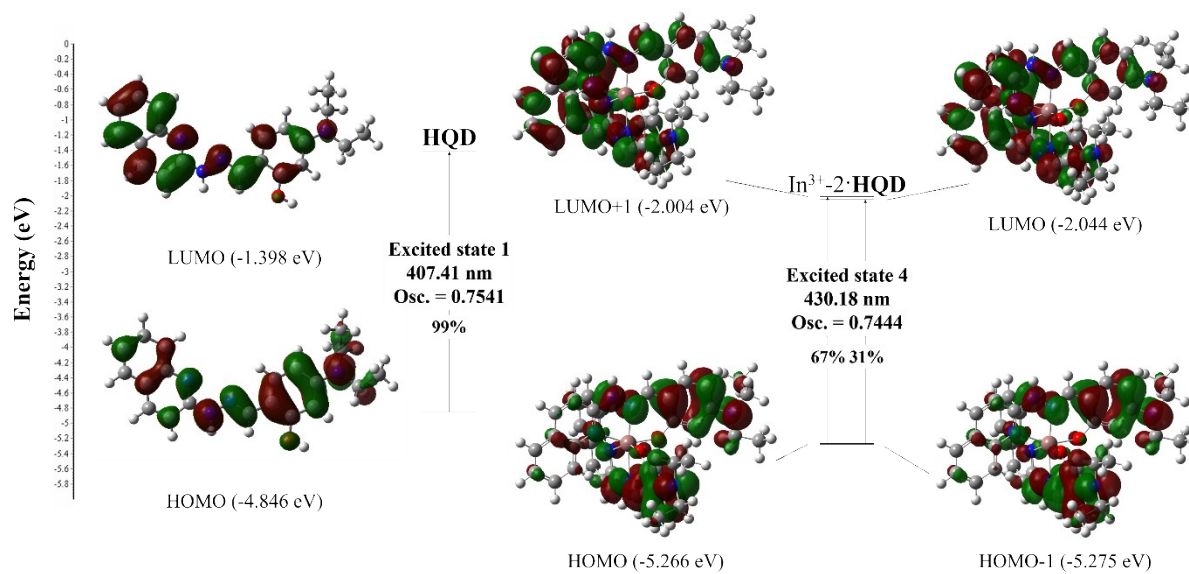

**Fig. S21** The major molecular orbital transitions and excitation energies of **HQD** and its  $\text{In}^{3+}$  complex.

(a)

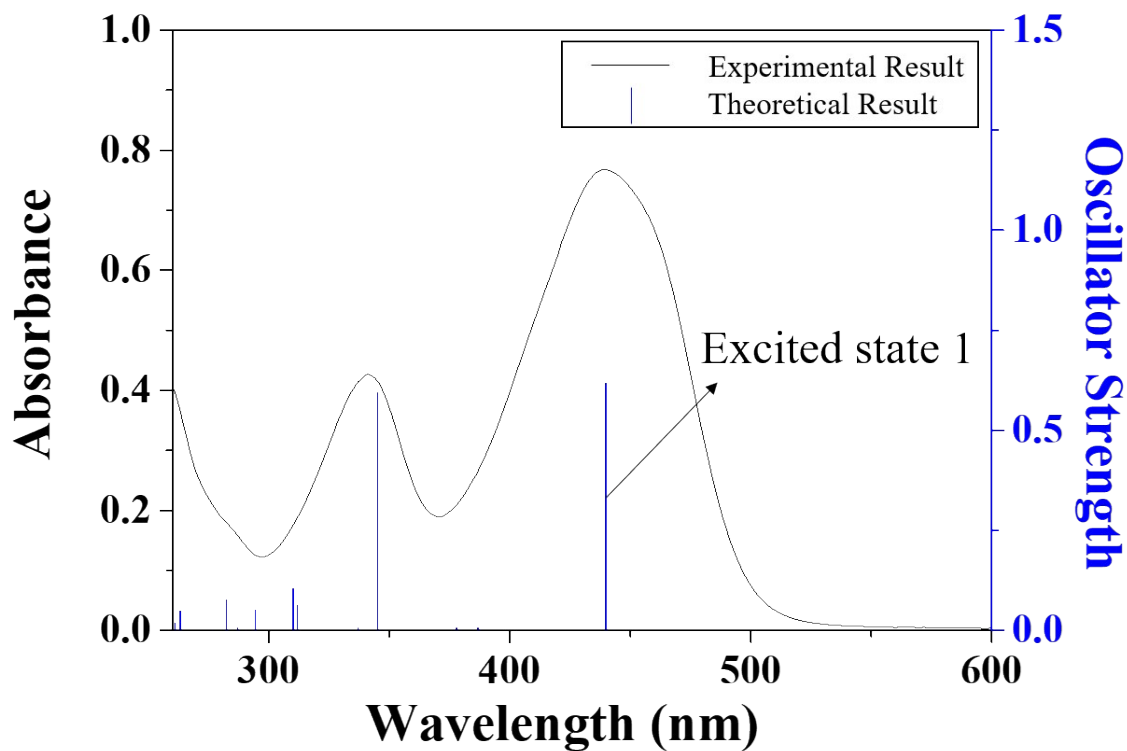

(b)

| Excited state 1 | Wavelength (nm) | Percent (%) | Main Character | Oscillator strength |
|-----------------|-----------------|-------------|----------------|---------------------|
| H → L           | 439.78          | 98          | ICT            | 0.6175              |

**Fig. S22** (a) The theoretical excitation energies and the experimental UV-vis spectrum of **HQD-Zn<sup>2+</sup>** complex. (b) The major electronic transition energies and molecular orbital contributions of **HQD-Zn<sup>2+</sup>** complex (H = HOMO and L = LUMO).

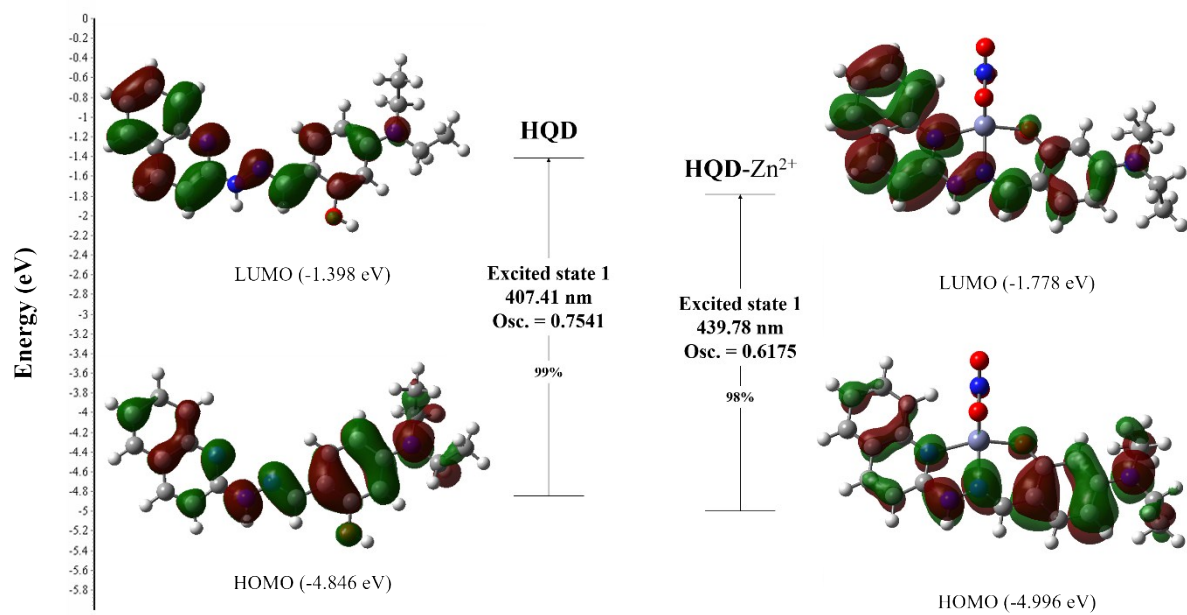

**Fig. S23** The major molecular orbital transitions and excitation energies of **HQD** and its **Zn<sup>2+</sup>** complex.

(a)

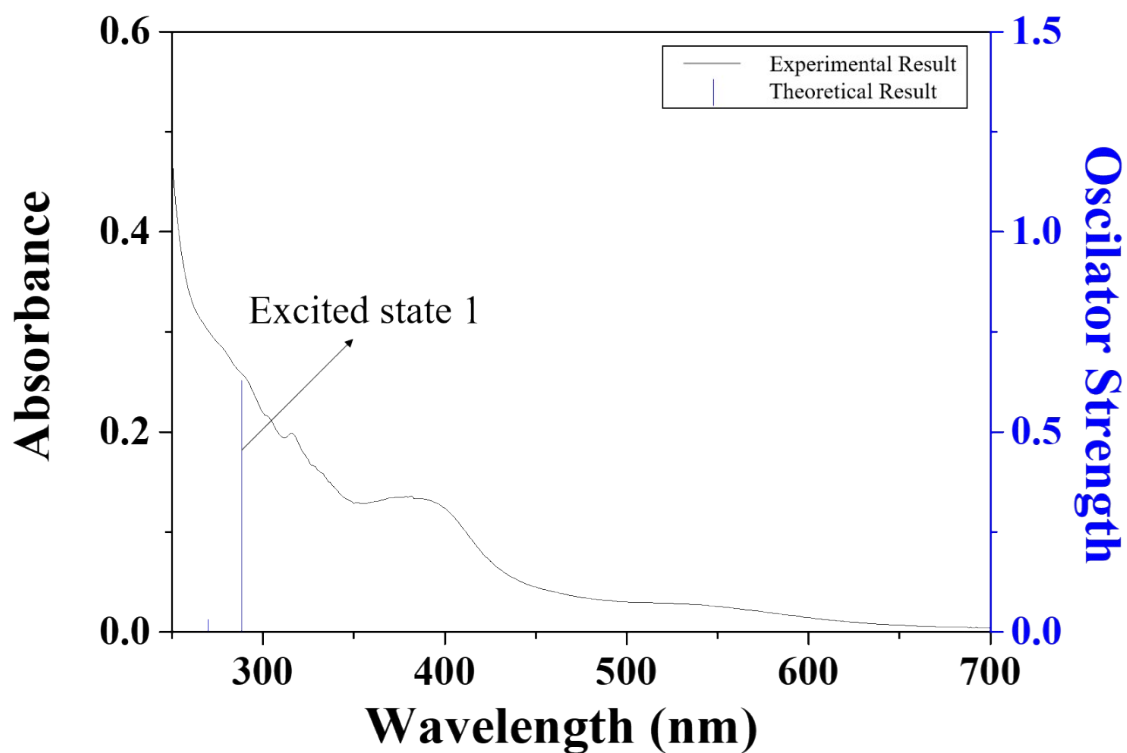

(b)

| Excited state 1 | Wavelength (nm) | Percent (%) | Main Character | Oscillator strength |
|-----------------|-----------------|-------------|----------------|---------------------|
| H → L           | 288.21          | 95          | ICT            | 0.6298              |

**Fig. S24** (a) The theoretical excitation energies and the experimental UV-vis spectrum of **DCA**. (b) The major electronic transition energies and molecular orbital contributions of **DCA** (H = HOMO and L = LUMO).

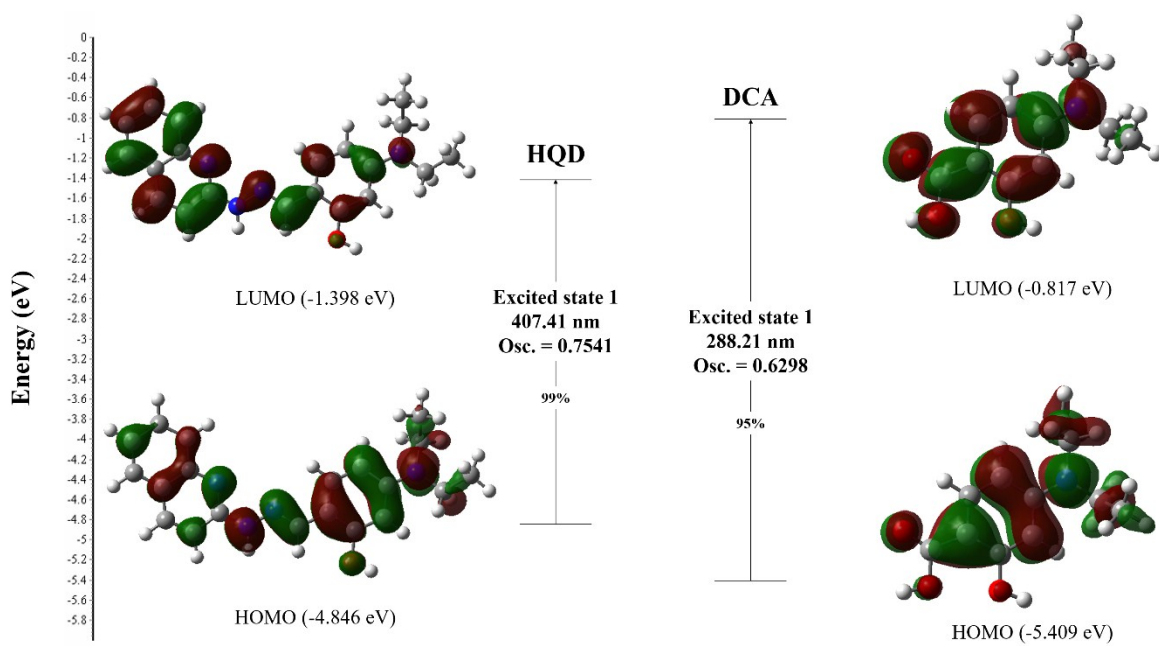

**Fig. S25** The major molecular orbital transitions and excitation energies of **HQD** and **DCA**.
